# Supplementary material for: Natural Killer Cells and Anti-Cancer Therapies: Reciprocal Effects on Immune Function and Therapeutic Response
Source: PubMed Central journal article supplement (PMC7916216; doi:10.3390/cancers13040711), 2021-02-09
Supplement: cancers-13-00711-s001.pdf [file cancers-13-00711-s001.pdf]

Supplementary Table 1: Clinical evaluations and studies included.

| Reference                      | Therapy | Patient details                                                                                                                                                               | Effects on/of NK cells                                                                                                                                                                       |
|--------------------------------|---------|-------------------------------------------------------------------------------------------------------------------------------------------------------------------------------|----------------------------------------------------------------------------------------------------------------------------------------------------------------------------------------------|
| Eric et al. 2009 [19]          | RT      | 39 patients with cervical cancer treated with external irradiation and concomitant intracavitary brachytherapy. (Total dose: external RT 64 Gy; brachytherapy 35 Gy).         | Decreases in the absolute number of pbNK cells compared to pre-treatment.                                                                                                                    |
| Clave et al. 1995 [21]         | RT      | 30 patients with various malignant hematological disorders treated with total body irradiation as part of their conditioning regimen pre-transplantation. (Total dose 12 Gy). | Decreases in the absolute number of pbNK cells compared to pre-treatment. More important reductions in the CD56 <sup>+</sup> CD16 <sup>-</sup> subset.                                       |
| Louagie et al. 1999 [22]       | RT      | 8 patients with carcinoma of the cervix or endometrium treated with external beam RT of the pelvis. (Total dose 46-50 Gy).                                                    | Reductions in the absolute number of pbNK cells compared to pre-treatment. Limited during the first weeks of therapy and higher afterwards.                                                  |
| Mozaffari et al. 2007 [23]     | RT      | 41 patients with breast cancer treated with RT or RT+CT were compared to 9 pretreatment patients with breast cancer. (Total dose: 50 Gy delivered to the breast).             | Reductions in both absolute pbNK cell numbers and <i>ex vivo</i> cytotoxicity in patients treated with RT and RT+CT compared to pre-treatment controls. Stronger decrease in RT+CT patients. |
| Nakayama et al. 1995 [24]      | RT      | 15 patients with lung cancer undergoing RT including bilateral mediastinal lymph nodes. (Total dose 40-50 Gy).                                                                | Decrease in both the absolute number and the percentage of pbNK cells compared to pre-treatment.                                                                                             |
| Belka et al. 1999 [25]         | RT      | 10 patients with seminoma testis treated with RT. (total dose 26 Gy delivered to paraaortal lymph nodes).                                                                     | Decline in the absolute number of pbNK cells compared to pre-treatment, which normalized after 6 weeks.                                                                                      |
| Domouchtsidou et al. 2018 [26] | RT      | 25 patients with various inoperable hepatic malignancies treated with selective internal radiotherapy ( <sup>90</sup> Y radioactive glass microspheres)                       | Decrease in the absolute number of pbNK compared to pre-treatment.                                                                                                                           |
| Yamaue et al. 1992 [27]        | RT      | 11 patients with advanced                                                                                                                                                     | Reduction in <i>ex vivo</i> pbNK                                                                                                                                                             |

|                              |     |                                                                                                                                                                                                                                |                                                                                                                                                                                                                                                                                                                                                                                                                                                                                                                                   |
|------------------------------|-----|--------------------------------------------------------------------------------------------------------------------------------------------------------------------------------------------------------------------------------|-----------------------------------------------------------------------------------------------------------------------------------------------------------------------------------------------------------------------------------------------------------------------------------------------------------------------------------------------------------------------------------------------------------------------------------------------------------------------------------------------------------------------------------|
| Blomgren et al. 1980 [29]    | RT  | cancer treated with RT (total dose: 25-35 Gy)<br>24 patients with breast cancer, 6 patients with prostate cancer, and 7 patients with carcinoma of the urinary bladder treated with local radiotherapy (total dose 45-64.5 Gy) | cell cytotoxic activity compared to pre-treatment.<br>Reduction in <i>ex vivo</i> pbNK cell cytotoxic activity compared to pre-treatment.                                                                                                                                                                                                                                                                                                                                                                                         |
| Urosevic et al. 2005 [37]    | RT  | Tissue from 38 primary (untreated) and 14 relapsed, after RT, basal cell carcinomas.                                                                                                                                           | Lower levels of HLA-G were found in the relapsed tumors.                                                                                                                                                                                                                                                                                                                                                                                                                                                                          |
| Ames et al. 2015 [39]        | RT  | Tissue from 12 patients with pancreatic ductal adenocarcinoma, Ewing sarcoma, and leiomyosarcoma treated with neoadjuvant RT.                                                                                                  | Enrichment of cancer stem cells and NKG2D ligands (MICA/B) compared to pre-treatment biopsies and untreated patients with sarcoma.                                                                                                                                                                                                                                                                                                                                                                                                |
| Matuszewski et al. 2011 [55] | RFA | 6 patients with renal cell cancer.                                                                                                                                                                                             | No significant changes in the number of pbNK cells compared to pre-treatment.                                                                                                                                                                                                                                                                                                                                                                                                                                                     |
| Zerbini et al. 2010 [56]     | RFA | 37 patients with HCC.                                                                                                                                                                                                          | Increase in the absolute number of pbNK cells compared to pre-treatment. Mostly due to increase in CD56 <sup>dim</sup> NK cells and accompanied by increased expression of various NK cell-activating receptors (NKG2D, CD16, NKp30, NKp46), reduced expression of the inhibitory receptor NKG2A and higher <i>in vitro</i> NK cell cytotoxicity, ADCC, and IFN $\gamma$ production compared to baseline. Increased IFN $\gamma$ -levels and NK cell cytotoxicity 4 weeks after RFA associated with longer disease-free survival. |
| Guan et al. 2013 [57]        | RFA | 9 patients with HCC.                                                                                                                                                                                                           | Increased pbNK cell levels compared to pre-treatment.                                                                                                                                                                                                                                                                                                                                                                                                                                                                             |
| Rochigneux et al. 2019 [58]  | RFA | 80 patients with HCC.                                                                                                                                                                                                          | Reduction of NKp30 <sup>+</sup> pbNK cells at day 1 after treatment which normalized after 1                                                                                                                                                                                                                                                                                                                                                                                                                                      |

|                              |      |                                                                                                                                                                               |                                                                                                                                                                                                                                                                                       |
|------------------------------|------|-------------------------------------------------------------------------------------------------------------------------------------------------------------------------------|---------------------------------------------------------------------------------------------------------------------------------------------------------------------------------------------------------------------------------------------------------------------------------------|
|                              |      |                                                                                                                                                                               | month. Higher frequency of NKp30 <sup>+</sup> pbNK cells 1 day after RFA correlated to lower tumor recurrence whereas a delayed increase of total NK cells and higher percentages of CD56 <sup>bright</sup> NK cells at 1 month after RFA were associated with more tumor recurrence. |
| Yu et al. 2020 [60]          | MWA  | 14 patients with breast cancer.                                                                                                                                               | Increased percentage of NK cells at 1 week with increased proportion of CD16 <sup>+</sup> CD56 <sup>+</sup> NK cells. Higher levels of NKp46 <sup>+</sup> CD3 <sup>-</sup> CD56 <sup>+</sup> cells; No increase in NKG2A <sup>+</sup> CD3 <sup>-</sup> CD56 <sup>+</sup> cells.       |
| Dong et al. 2003 [61]        | MWA  | 89 nodules from 82 patients with HCC.                                                                                                                                         | Stronger NK cell infiltration in treated and untreated lesions compared to pre-treatment. Stronger NK cell infiltration correlated to lower recurrence rate.                                                                                                                          |
| Zhang et al. 2017 [62]       | MWA  | 45 patients with HCC.                                                                                                                                                         | No significant changes in pbNK cell frequency compared to pre-treatment.                                                                                                                                                                                                              |
| Szmigielski et al. 1991 [63] | MWA  | 15 patients with advanced adenocarcinoma of the prostate + 15 patients with severely symptomatic benign prostatic hyperplasia treated with transrectal microwave hyperthermia | Higher levels of <i>ex vivo</i> pbNK cell cytotoxicity after treatment in patients with cancer. More pronounced increase in patients with CR or PR.                                                                                                                                   |
| F. Wu et al. 2004 [65]       | HIFU | 16 patients with solid malignancies.                                                                                                                                          | No significant differences in pbNK cell frequency and cytotoxicity compared to pre-treatment.                                                                                                                                                                                         |
| Wang et al. 2013 [66]        | HIFU | 60 patients with uterine fibroids.                                                                                                                                            | No significant differences in pbNK cell frequency compared to pre-treatment.                                                                                                                                                                                                          |
| Ma, Liu, and Yu 2019 [67]    | HIFU | 96 patients with primary liver cancer.                                                                                                                                        | Higher levels of pbNK cells compared to pre-treatment were measured with enzyme-linked immunosorbent assay.                                                                                                                                                                           |
| Lu et al. 2009 [68]          | HIFU | 48 patients with breast cancer undergoing mastectomy of which 23                                                                                                              | HIFU treated patients had higher intratumoral levels of CD57+ cells compared to                                                                                                                                                                                                       |

|                              |                    |                                                                                                                             |                                                                                                                                                                                                                                                                                       |
|------------------------------|--------------------|-----------------------------------------------------------------------------------------------------------------------------|---------------------------------------------------------------------------------------------------------------------------------------------------------------------------------------------------------------------------------------------------------------------------------------|
|                              |                    | were treated with HIFU prior surgery. Tissue analyzed after surgery.                                                        | untreated controls.                                                                                                                                                                                                                                                                   |
| Sanseviero et al. 2020 [91]  | $\alpha$ CTLA-4 CI | RNA-seq data from patients with malignant melanoma treated with ipilimumab.                                                 | Higher levels of CD56 cells in patients that benefit from the therapy.                                                                                                                                                                                                                |
| Tallerico et al. 2017 [92]   | $\alpha$ CTLA-4 CI | 67 melanoma patients treated with ipilimumab.                                                                               | Increased frequency of CD56 <sup>dim</sup> CD16 <sup>+</sup> pbNK cells correlated with survival.                                                                                                                                                                                     |
| Sottile et al. 2019 [93]     | $\alpha$ CTLA-4 CI | 27 malignant mesothelioma patients treated with tremelimumab.                                                               | A perturbation of the CD56 <sup>dim</sup> /CD56 <sup>bright</sup> ratio was found compared to healthy donors which normalized after treatment. Overall survival correlated with high DNAM1 <sup>+</sup> CD56 <sup>dim</sup> pbNK cells and increased levels of NKp46 after treatment. |
| Tietze et al. 2017 [94]      | $\alpha$ CTLA-4 CI | 32 patients with metastatic melanoma treated with ipilimumab.                                                               | Increase in the proportion of CD56 <sup>dim</sup> NK cells in patients with low baseline levels thereof after treatment.                                                                                                                                                              |
| Okita et al. 2019 [135]      | CT                 | 10 patients with NSCLC treated with neoadjuvant platinum-based chemotherapy. Tissue was collected before and after surgery. | Decrease in levels of MICA/B in 2 patients<br>Reduced expression of ULBP-2/5/6 in 4 patients                                                                                                                                                                                          |
| Sako et al. 2004 [141]       | CT                 | 10 patients with NSCLC treated with paclitaxel.                                                                             | Decrease in <i>ex vivo</i> pbNK cell activity at 1 and 8 days after treatment; no difference in pbNK cell frequency.                                                                                                                                                                  |
| Tong et al. 2000 [142]       | CT                 | 10 patients with various advanced cancers treated with docetaxel (N=5) or paclitaxel (N=5).                                 | Decrease in pbNK cell frequency at 1 and 4 weeks after docetaxel but not after paclitaxel compared to pre-treatment.                                                                                                                                                                  |
| X. Wu et al. 2010 [143]      | CT                 | 13 patients with advanced ovarian cancer treated with carboplatin plus paclitaxel.                                          | No significant difference in NK cell frequency and <i>ex vivo</i> cytotoxicity compared to pre-treatment.                                                                                                                                                                             |
| di Modica et al. 2016 [145]  | CT                 | 8 patients with breast cancer treated with 3-4 cycles adriamycin plus docetaxel.                                            | Significantly higher expression of NKG2D on NK cells after CT compared to pre-treatment.                                                                                                                                                                                              |
| Kelly-Sell et al. 2012 [155] | CT                 | 8 patients with cutaneous T-cell lymphomas treated with romidepsin.                                                         | Decrease in <i>ex vivo</i> pbNK cell degranulation compared to pre-treatment levels.                                                                                                                                                                                                  |

|                                  |     |                                                                                                                                                     |                                                                                                                                                                                                                       |
|----------------------------------|-----|-----------------------------------------------------------------------------------------------------------------------------------------------------|-----------------------------------------------------------------------------------------------------------------------------------------------------------------------------------------------------------------------|
| Massa et al. 2020 [172]          | CT  | 56 patients with triple-negative breast cancer treated with nanoparticle albumin-bound paclitaxel followed by epirubicin and cyclophosphamide (EC). | Decrease in the absolute number of pbNK cells after EC compared to pre-treatment and post paclitaxel levels.                                                                                                          |
| Aldarouish et al. 2019 [173]     | CT  | 50 patients with NSCLC treated with cisplatin/nedaplatin and pemetrexed.                                                                            | Decrease in the absolute number and percentage of pbNK cells after CT.                                                                                                                                                |
| Shinko et al. 2019 [174]         | CT  | 10 patients with colorectal cancer treated with 5-FU, oxaliplatin and leucovorin.                                                                   | Decrease in the absolute number of pbNK cells after CT. Decrease observed in various NK cell subpopulations: CD56 <sup>dim</sup> CD16 <sup>+</sup> , CD56 <sup>dim</sup> CD16 <sup>-</sup> , CD56 <sup>bright</sup> . |
| Beitsch et al. 1994 [175]        | CT  | 10 patients with breast cancer treated with 5-fluorouracil, cyclophosphamide, adriamycin.                                                           | Decrease in <i>ex vivo</i> NK cell cytotoxicity compared to pre-treatment.                                                                                                                                            |
| Sewell et al. 1993 [176]         | CT  | 16 patients with breast cancer treated with 5-fluorouracil, cyclophosphamide, methotrexate.                                                         | Decrease in <i>ex vivo</i> NK cell cytotoxicity compared to pre-treatment.                                                                                                                                            |
| Brenner and Margolese 1991 [177] | CT  | Patients with breast cancer receiving no treatment, various CT combinations and/or endocrine therapy.                                               | CT resulted in a decline in <i>ex vivo</i> NK cell function. More pronounced in more advanced patients.                                                                                                               |
| Ogura et al. 2016 [178]          | CT  | 25 patients with adult T-cell leukemia–lymphoma (N=14) or peripheral T-cell lymphoma (N=11) receiving various CT combinations.                      | Decrease in NK cell frequency and <i>ex vivo</i> function dependent on disease type and intensity of CT.                                                                                                              |
| Mustjoki et al. 2013 [188]       | PKI | 55 patients with leukemia treated with either dasatinib (N=37), imatinib (N=8), nilotinib (N=8) or bosutinib (N=2).                                 | No differences in <i>ex vivo</i> NK cell degranulation and cytotoxicity after imatinib or nilotinib whereas this was increased after dasatinib compared to pre-treatment levels and healthy controls.                 |
| Hayashi et al. 2012 [189]        | PKI | 63 patients with chronic myeloid leukemia treated with either imatinib (N=36), nilotinib (N=9), dasatinib (N=18).                                   | Increased NK cell cytotoxicity after dasatinib but not after imatinib and nilotinib. In the dasatinib group, the levels of NK cell cytotoxicity tended                                                                |

|                             |     |                                                                                             |                                                                                                                                                                                                         |
|-----------------------------|-----|---------------------------------------------------------------------------------------------|---------------------------------------------------------------------------------------------------------------------------------------------------------------------------------------------------------|
|                             |     |                                                                                             | to be higher in patients with complete cytogenetic response.                                                                                                                                            |
| Kreutzman et al. 2019 [190] | PKI | 33 patients with chronic myeloid leukemia treated with imatinib (N=20) or bosutinib (N=13). | Significant increase in the proportion of CD56+ CD16+ NK cells and NK cell degranulation after imatinib but not bosutinib.                                                                              |
| Illander et al. 2017 [191]  | PKI | 100 patients with chronic myeloid leukemia treated with imatinib.                           | The proportion of NK cells at 1 month after discontinuation was associated with molecular relapse-free survival.                                                                                        |
| Rea et al. 2017 [192]       | PKI | 51 patients with chronic myeloid leukemia treated with imatinib.                            | Higher absolute number of pbNK cells (CD56 <sup>+</sup> CD3 <sup>-</sup> ) and CD56 <sup>dim</sup> pbNK cells at the time of imatinib discontinuation was associated with higher relapse-free survival. |

pbNK: peripheral blood Natural Killer. RT: radiotherapy. RFA: radiofrequency ablation therapy. MWA: microwave ablation therapy. CI: checkpoint inhibitor therapy. CT: chemotherapy. PKI: protein kinase inhibitors. HCC: hepatocellular carcinoma. CR: complete response. PR: partial response. NSCLC: non-small-cell lung cancer. 5-FU: 5-fluorouracil.
